# Supplementary material for: Detection of Infectious Viruses Using CRISPR-Cas12-Based Assay
Source: MDPI journal article supplement (doi:10.3390/bios11090301), 2021-08-28
Supplement: s1 [file s1]

## Supplementary Materials

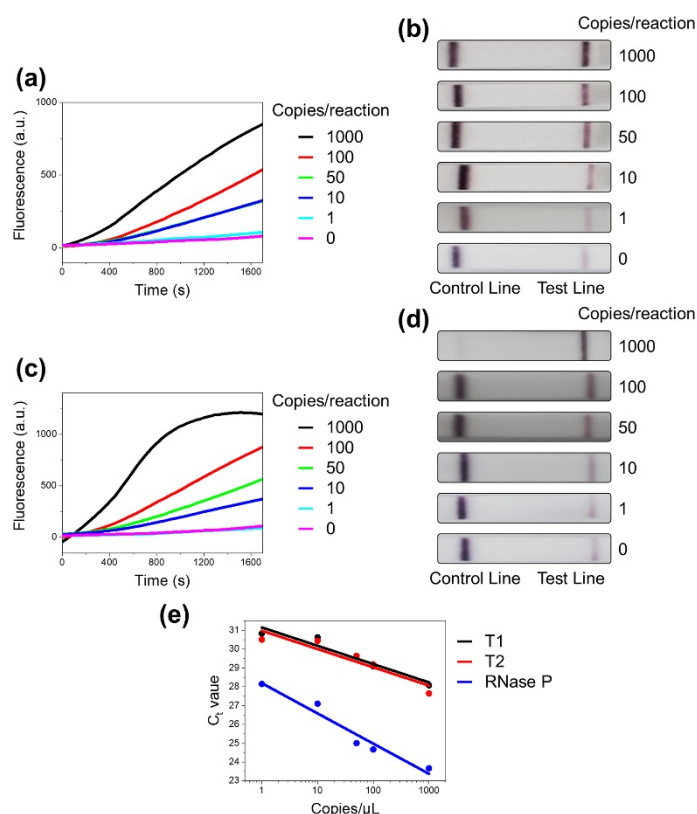

**Figure S1.** (a) Fluorescence and (b) LFA detection results of synthetic S gene of SARS-CoV-2 (T1) using CRISPR-Cas12-based assay. (c) Fluorescence and (d) LFA detection results of synthetic RNase P gene using CRISPR-Cas12-based assay. Copy number of T2 and RNase P was varied from 1000 to 1 copy/reaction. (e) PCR results of synthetic S gene of SARS-CoV-2 (T1 and T2) and RNase P gene. Copy numbers were varied from 1000 to 1 copy/reaction.

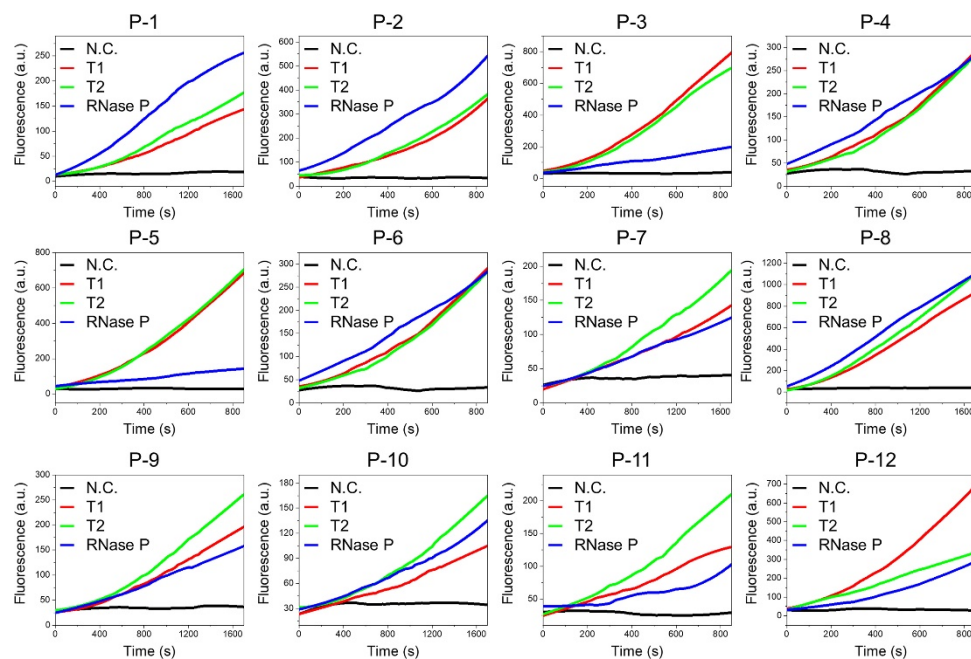

**Figure S2.** Fluorescence detection results of SARS-CoV-2 in COVID-19 patient samples using CRISPR-Cas12-based assay.

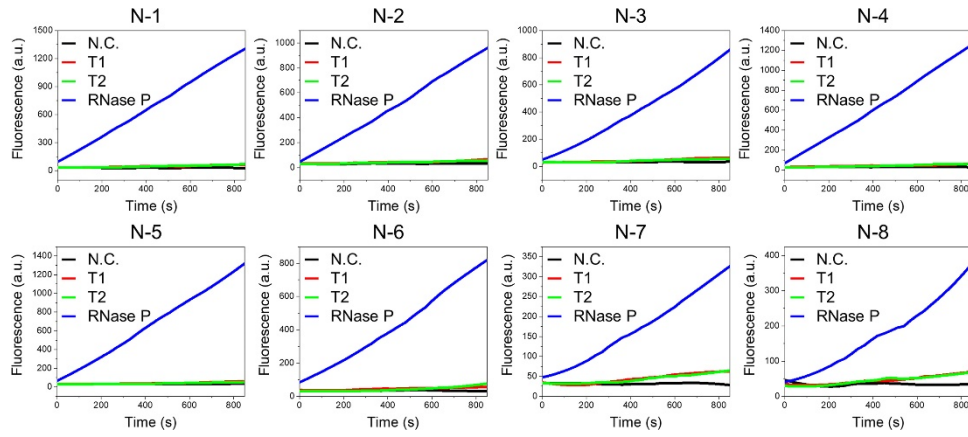

**Figure S3.** Fluorescence detection results of SARS-CoV-2 in healthy people samples using CRISPR-Cas12-based assay.

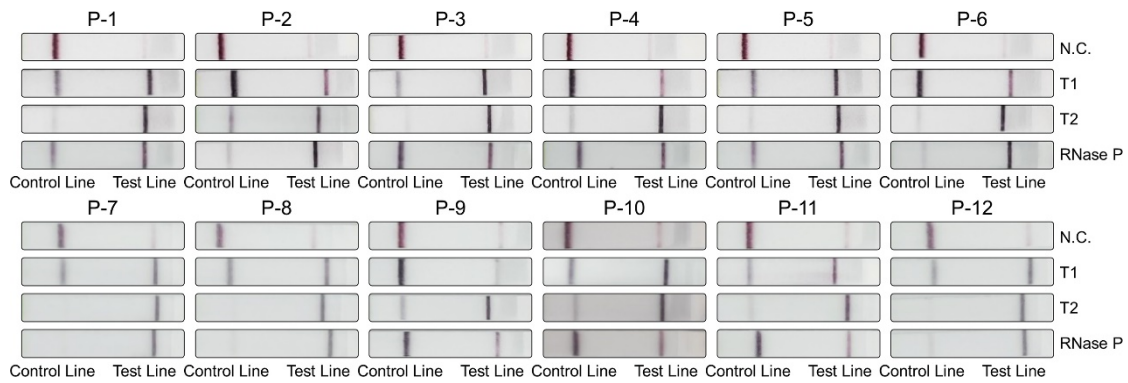

**Figure S4.** LFA detection results of SARS-CoV-2 in COVID-19 patient samples using CRISPR-Cas12-based assay.

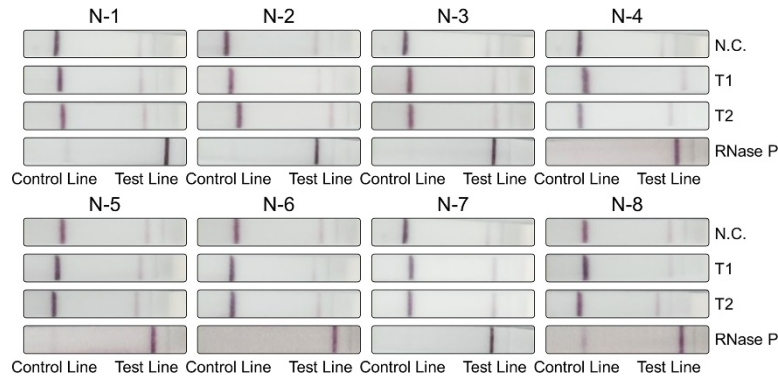

**Figure S5.** LFA detection results of SARS-CoV-2 in healthy people samples using CRISPR-Cas12-based assay.

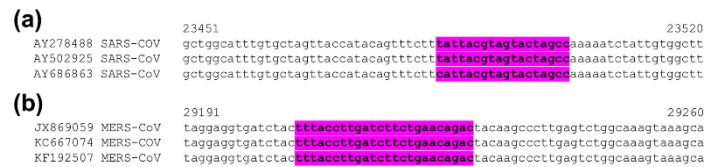

**Figure S6.** Sequence alignment of (a) S gene in SARS-CoV and (b) N gene of MERS-CoV. Regions colored in magenta are the selected target regions for the detection.

```

22881                                22960
MZ344997_alpha attctaacaatcttgattctaaggttggtggttaattataattacctgtatagattgtttaggaagtctaatctcaaacct
MW598419_beta attctaacaatcttgattctaaggttggtggttaattataattacctgtatagattgtttaggaagtctaatctcaaacct
MZ169911_gamma attctaacaatcttgattctaaggttggtggttaattataattacctgtatagattgtttaggaagtctaatctcaaacct
MZ359841_delta attctaacaatcttgattctaaggttggtggttaattataattaccggtatagattgtttaggaagtctaatctcaaacct
.....

22961                                23040
MZ344997_alpha tttgagagagatatttcaactgaaatctatcaggccggtagcacaccttgtaattggtgttgaaggttttaattgttactt
MW598419_beta tttgagagagatatttcaactgaaatctatcaggccggtagcacaccttgtaattggtgttgaaggttttaattgttactt
MZ169911_gamma tttgagagagatatttcaactgaaatctatcaggccggtagcacaccttgtaattggtgttgaaggttttaattgttactt
MZ359841_delta tttgagagagatatttcaactgaaatctatcaggccggtagcaaaccttgtaattggtgttgaaggttttaattgttactt
.....

```

**Figure S7.** Sequence alignment of S gene in SARS-CoV-2 variants. Regions colored in yellow and skyblue indicate SARS-CoV-2 specific T1 and T2, respectively, next to PAM sequence marked in red.

**Table S1.** Primer list.

| Name            | Sequence                         |
|-----------------|----------------------------------|
| SARS-CoV-2 S FP | ACAGGCTGCGTTATAGCTTGGAATTCTAAC   |
| SARS-CoV-2 S RP | CCTTCAACACCATTACAAGGTGTGCTACCG   |
| SARS-CoV S FP   | TGAGTGCGACATTCCTATTGGAGCTGGCAT   |
| SARS-CoV S RP   | GTAGGTATAGCAATGGTGTTATTAGAG-TAA  |
| MERS-CoV N FP   | G TTCACAAGGTTCAAGATCAG-GAAACTCTA |
| MERS-CoV N RP   | TTCTTAGTGATTACTTTTGGCTGCGATTGC   |
| RNase P FP      | GTGGAGCTTGTTGATGAGCTG-GAGCCAGAG  |
| RNase P RP      | TCCGAGGTCCAGTACTCAGCATGCGAA-GAG  |

**Table S2.** gRNA list.

| Name               | Sequence                                       |
|--------------------|------------------------------------------------|
| SARS-CoV-2 T1 gRNA | UAAUUUCUACUAAGUGUAGAUGGAA-<br>GUCUAAUCUCAACCU  |
| SARS-CoV-2 G2 gRNA | UAAUUUCUACUAAGUGUAGAU-<br>AACUGAAAUCUAUCAGGCCG |
| RNase P gRNA       | UAAUUUCUACUAAGUGUAGAUAAUUAC-<br>UUGGGUGUGACCCU |
| Ascpf1 T1 gRNA     | UAAUUUCUACUUUGUAGAUGGAAGUCU-<br>AAUCUCAACCU    |
| Eecpf1 T1 gRNA     | UAAUUUCUACUUUGUAGAUGGAAGUCU-<br>AAUCUCAACCU    |
| MERS-CoV N gRNA    | UAAUUUCUACUAAGUGUAGAC-<br>CUUGAUCUUCUGAACAGAC  |
| SARS-CoV S gRNA    | UAAUUUCUACUAAGUGUAGAU-<br>UUAUUACGUAGUACUAGCC  |

**Table S3.** dsDNA gene fragments.

| Name              | Sequence                                                                                                                                                                                                                                 |
|-------------------|------------------------------------------------------------------------------------------------------------------------------------------------------------------------------------------------------------------------------------------|
| SARS-CoV-2 S gene | GAAATTAATACGACTCACTATAGGGGATGATTTTACAGGCTGCGTTATAGCTT-<br>GGAATTCTAACAATCTTGATTCTAAGGTTGGTGGTAATTATAATTACCTGTAT<br>AGATTGTTTAGGAAGTCTAATCTCAAACCTTTTGAGAGAGA-<br>TATTTCAACTGAAATCTATCAGGCCGGTAGCACACCTTGTAATGGTGTGAA<br>GGTTTAAATTGTTACT |
| SARS-CoV S gene   | GAAATTAATACGACTCACTATAGGGCGACACTTCTTATGAGTGCGACATTCC-<br>TATTGGAGCTGGCATTGTGTCTAGTTACCATACAGTTTCTTTATTACGTAGTAC<br>TAGCCAAAAATCTATTGTGGCTTATACTATGTCTTTAGGTGCTGA-<br>TAGTTCAATT-<br>GCTTACTCTAATAACACCATTGCTATACCTACTAACTTTTCAATTAG      |
| MERS-CoV N gene   | GAAATTAATACGACTCACTATAGGGCAGATCTAGTTCACAAGGTTCAA-<br>GATCAGGAAACTC-<br>TACCCGCGGCACTTCTCCAGGTCCATCTGGAATCGGAGCAGTAGGAGGTGAT<br>CTACTTTACCTTGATCTTCTGAACAGACTACAAGCCCTTGAGTCTGG-<br>CAAAGTAAAGCAATCGCAGCCAAAAGTAATCACTAAGAAAGATGCTGCT     |

**Table S4.** PCR results of clinical samples.

| Sample number | Sample type              | Ct value |
|---------------|--------------------------|----------|
| 1             | Nasopharyngeal aspirates | 20.85    |
| 2             | Sputum                   | 24.67    |
| 3             | Nasopharyngeal aspirates | 14.41    |
| 4             | Nasopharyngeal aspirates | 29.75    |
| 5             | Sputum                   | 20.66    |
| 6             | Nasopharyngeal aspirates | 18.91    |
| 7             | Sputum                   | 17.86    |
| 8             | Nasopharyngeal aspirates | 19.61    |
| 9             | Sputum                   | 23.27    |
| 10            | Nasopharyngeal aspirates | 25.93    |
| 11            | Sputum                   | 23.99    |
| 12            | Sputum                   | 22.43    |
